# Supplementary material for: Cumulative live birth rate of a blastocyst versus cleavage stage embryo transfer policy during in vitro fertilisation in women with a good prognosis: multicentre randomised controlled trial
Source: PubMed Central journal article supplement — BMJ. 2024 Sep 16;386:e080133. doi: 10.1136/bmj-2024-080133 (PMC11403767; doi:10.1136/bmj-2024-080133), 2024-09-16
Supplement: cors080133.ww.pdf [file cors080133.ww.pdf]

## **Supplementary Appendix**

This appendix has been provided by the authors to give readers additional information about the work.

Supplement to: Cumulative live birth rate of a blastocyst versus cleavage stage embryo transfer policy during in vitro fertilisation in women with a good prognosis: multicentre randomised controlled trial.

**Table of content**

|                        |                                                                                      |   |
|------------------------|--------------------------------------------------------------------------------------|---|
| Supplementary figure 1 | Time-to-conception leading to a live birth                                           | 1 |
| Supplementary figure 2 | Forest plot blastocysts-stage versus cleavage-stage transfer                         | 2 |
| Supplementary figure 3 | Cumulative live birth rate per age group (subgroup analysis)                         | 3 |
| Supplementary table 1  | Cumulative live-birth and fresh embryo transfer results in the per protocol analysis | 4 |
| Supplementary table 2  | Cumulative live-birth results in subgroups                                           | 5 |
| Supplementary table 3  | Cumulative results according to definitions of infertility core-out come set         | 6 |

Supplementary figure 1: Time-to-conception leading to a live birth

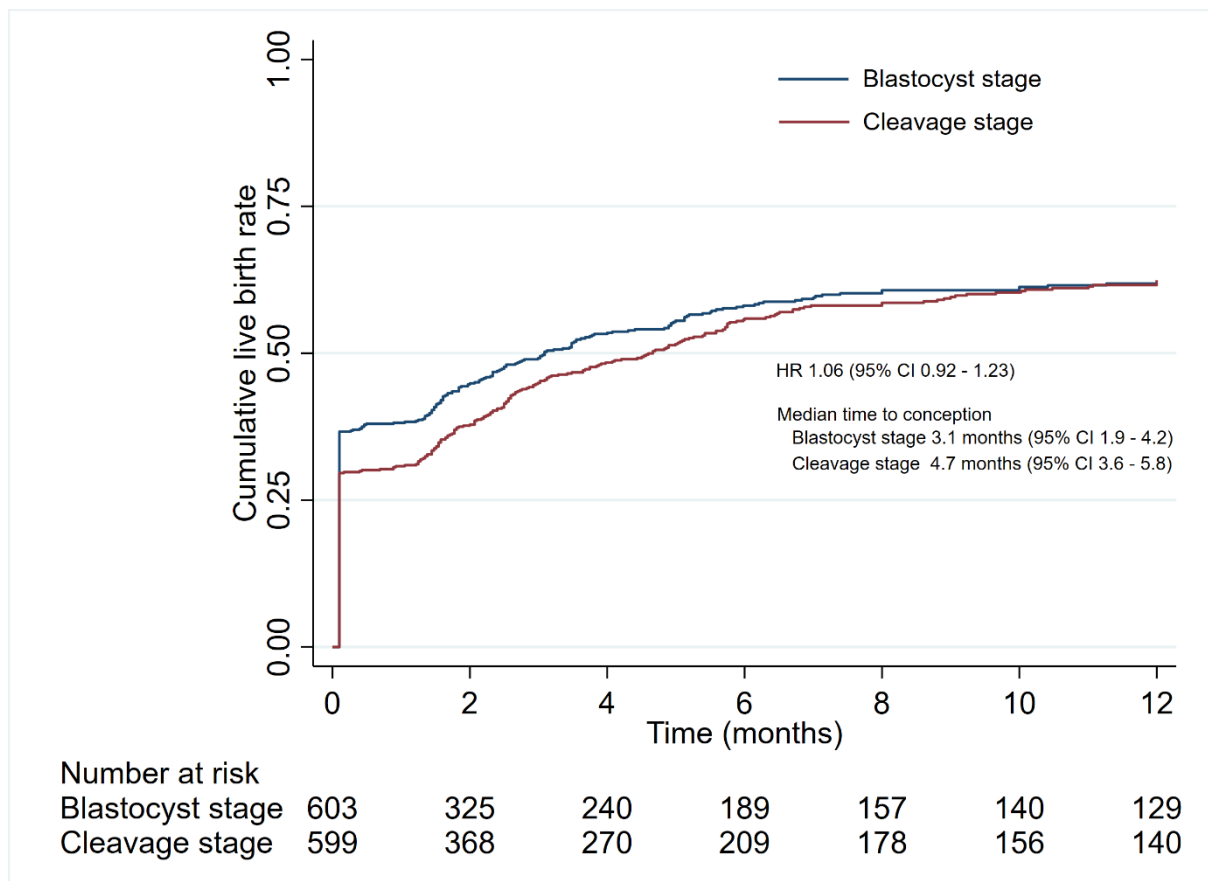

Cumulative conception leading to live birth expressed over a time horizon of 12 months. In the graph, the hazard ratio (HR) with corresponding 95% confidence interval is provided, as well as the median time-to-conception leading to a live birth. Beneath the graph, the number of patients at risk represent the number of non-pregnant patients and is given per time point. The log-rank P value for equality between the 2 graphs was 0.35 CI= confidence interval; HR=hazard ratio

Supplementary figure 2: Forest plot blastocyst-stage versus cleavage-stage transfer

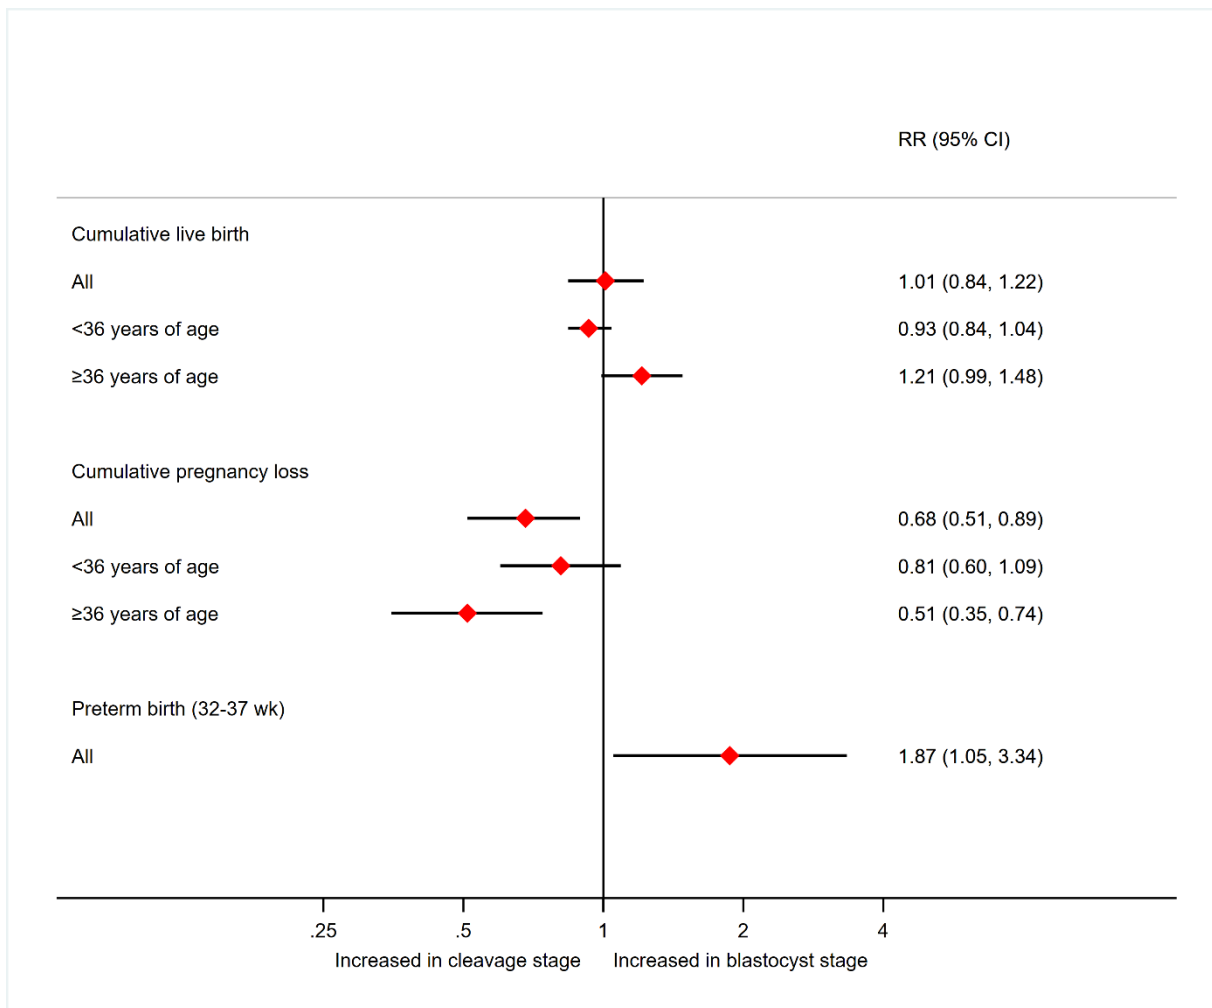

Data are risk ratios (95% Confidence Interval)(see also Table 2)

Supplementary figure 3: Cumulative live birth rate per age group (subgroup analysis)

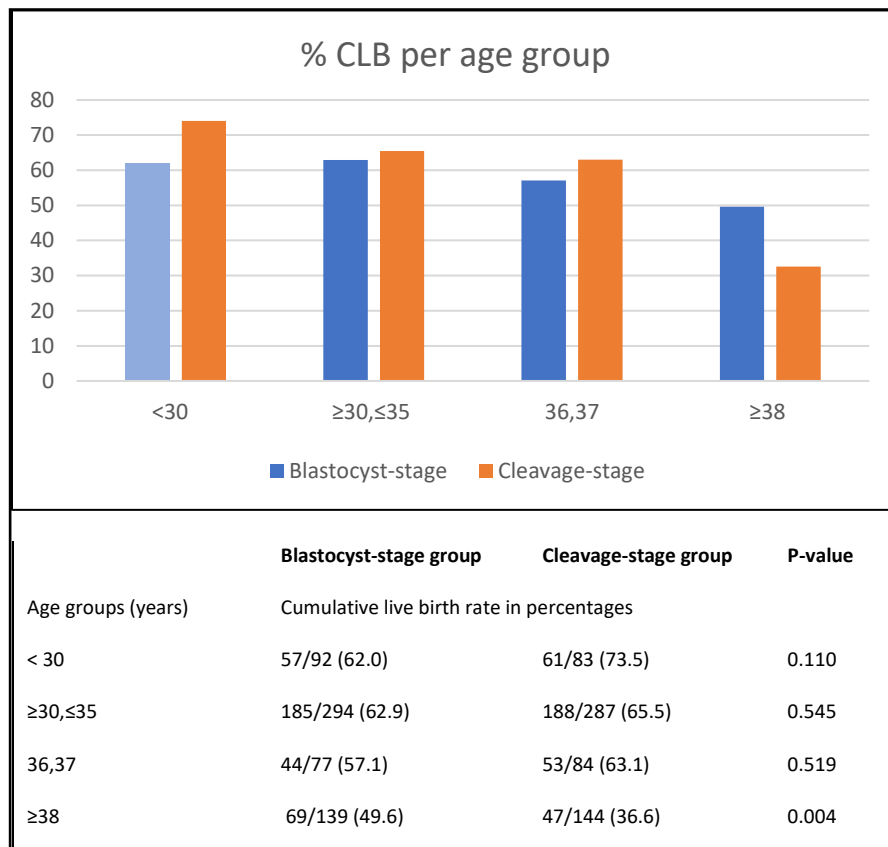

Data are n/N (%) unless otherwise stated

CLB= Cumulative live birth

Supplementary table 1: Cumulative live-birth and fresh embryo transfer results in the per protocol analysis

|                                       | <b>Blastocyst-stage group (n=593)</b> | <b>Cleavage-stage group (N=556)</b> | <b>Absolute Difference (95% CI)</b> | <b>Risk Ratio (95% CI)</b> |
|---------------------------------------|---------------------------------------|-------------------------------------|-------------------------------------|----------------------------|
| <b>Cumulative results*</b>            |                                       |                                     |                                     |                            |
| Cumulative live birth rate            | 349/593 (58.9)                        | 342/556 (61.5)                      | -2.6 (-8.2 to 3.0)                  | 0.96 (0.80 to 1.16)        |
| Cumulative ongoing pregnancy rate     | 356/593 (60.0)                        | 346/556 (62.2)                      | -2.1 (-7.7 to 3.4)                  | 0.97 (0.80 to 1.17)        |
| Cumulative clinical pregnancy rate    | 372/593 (62.7)                        | 374/556 (67.3)                      | -4.5 (-10.0 to 1.0)                 | 0.94 (0.78 to 1.13)        |
| Cumulative biochemical pregnancy      | 424/593 (71.5)                        | 426/556 (76.6)                      | -5.1 (-10.1 to -0.1)                | 0.93 (0.78 to 1.12)        |
| Cumulative pregnancy loss             | 98/593 (16.5)                         | 131/556 (23.6)                      | -7.2 (-11.8 to -2.6)                | 0.70 (0.52 to 0.93)        |
| <b>Fresh embryo transfer results*</b> |                                       |                                     |                                     |                            |
| Live birth rate                       | 219/593 (36.9)                        | 175/556 (31.5)                      | 5.5 (0.0 to 10.9)                   | 1.19 (0.94 to 1.49)        |
| Ongoing pregnancy rate                | 223/593 (37.6)                        | 178/556 (32.0)                      | 5.6 (0.1 to 11.0)                   | 1.19 (0.94 to 1.50)        |
| Clinical pregnancy rate               | 239/593 (40.3)                        | 195/556 (35.1)                      | 5.3 (-0.3 to 10.9)                  | 1.16 (0.93 to 1.45)        |
| Biochemical pregnancy                 | 280/593 (47.2)                        | 242/556 (43.5)                      | 3.7 (-2.0 to 9.5)                   | 1.09 (0.88 to 1.34)        |
| Pregnancy loss                        | 61/593 (10.2)                         | 67/556 (12.1)                       | -2.3 (-5.9 to 1.3)                  | 0.81 (0.56 to 1.18)        |

Data are n/N (%) unless otherwise stated.

Biochemical pregnancy was defined as positive home pregnancy test 14–17 days after oocyte retrieval.

Clinical pregnancy was defined as the presence of at least one gestational sac 5-8 weeks after oocyte retrieval.

Ongoing pregnancy rate was defined as a viable intrauterine pregnancy with fetal heartbeat 10–12 weeks after oocyte retrieval.

Live birth rate was defined as a delivery resulting in a live born child after 24th week of gestation.

Pregnancy loss was defined as pregnancy loss after pregnancy was determined by a positive pregnancy test (<21 weeks).

Definitions for cumulative pregnancy and pregnancy loss rates were the same with the addition that at least one pregnancy or pregnancy loss occurred during the follow-up period of 1 year. Each woman could have multiple pregnancies due to the follow-up period of 1 year.

CI= Confidence Interval

\*Absolute differences and risk ratios were adjusted for age group.

Supplementary table 2: Cumulative live-birth results in subgroups

|                                                        | <b>Blastocyst-stage group</b> | <b>Cleavage-stage group</b> | <b>Risk Ratio (95% CI)</b> |
|--------------------------------------------------------|-------------------------------|-----------------------------|----------------------------|
| Protocol                                               |                               |                             |                            |
| GnRH antagonist                                        | 116/190 (61.1)                | 100/175 (57.1)              | 1.08 (0.77 to 1.51)        |
| GnRH agonist                                           | 237/407 (58.8)                | 249/422 (59.0)              | 1.00 (0.70 to 1.25)        |
| Fertilisation method                                   |                               |                             |                            |
| IVF                                                    | 154/279 (55.2)                | 142/271 (52.4)              | 1.07 (0.80 to 1.42)        |
| ICSI                                                   | 196/316 (62.0)                | 198/315 (62.8)              | 0.98 (0.76 to 1.26)        |
| Both                                                   | 5/7 (71.4)                    | 10/13 (76.9)                | 0.94 (0.23 to 3.86)        |
| Participants with single embryo transfers only         | 330/543 (60.8)                | 327/529 (61.8)              | 0.99 (0.81 to 1.20)        |
| Transfer of blastocyst in blastocyst-stage group only* | 349/558 (62.5)*               | 350/599 (58.4)              | 1.08 (0.89 to 1.30)        |
| Method of cryopreservation: vitrification only         | 353/601 (58.7)                | 321/ 547 (58.7)             | 1.00 (0.83 to 1.21)        |
| Per laboratory**/**                                    |                               |                             |                            |
| A (2 centers)                                          | 11/17 (64.7)                  | 10/20 (50.0)                | 1.25 (0.42 to 3.70)        |
| B (4 centers)                                          | 99/162 (61.1)                 | 91/149(61.1)                | 1.01 (0.70 to 1.44)        |
| C (2 centers)                                          | 11/19 (57.9)                  | 8/17 (47.1)                 | 1.25 (0.41 to 3.84)        |
| D (3 centers)                                          | 86/143 (60.1)                 | 87/137 (64.0)               | 0.97 (0.66 to 1.42)        |
| E (3 centers)                                          | 46/87 (52.9)                  | 30/73(41.1)                 | 1.27 (0.73 to 2.23)        |
| F (1 centre)                                           | 1/5 (20.0)                    | 3/5 (60.0)                  | 0.32 (0.02 to 5.58)        |
| G (1 centre)                                           | 18/41 (43.9)                  | 24/55 (43.6)                | 1.01 (0.48 to 2.10)        |
| H (1 centre)                                           | 10/11 (90.9)                  | 9/11 (81.8)                 | 1.11 (0.32 to 3.86)        |
| I (1 centre)                                           | 18/23 (78.3)                  | 19/33 (57.6)                | 1.38 (0.59 to 3.19)        |
| J (2 centers)                                          | 33/64 (51.6)                  | 49/67 (73.1)                | 0.72 (0.41 to 1.27)        |
| K (1 centre)                                           | 22/31 (71.0)                  | 20/33 (60.6)                | 1.12 (0.51 to 2.46)        |

Data are n/N (%) unless otherwise stated.

CI= Confidence Interval

Risk ratio was adjusted for age group.

\* Participants with transfer of embryos with delayed development stage such as morula on day 5, were excluded

\*\* A post-hoc subgroup analysis of laboratories revealed no interaction between laboratory and treatment on cumulative live birth rate (p=0.465)

\*\*\* Each laboratory always collaborated with the same centre(s). A post-hoc subgroup analysis performed with a generalised estimating model including centre as factor variable revealed a risk ratio of 1.009 (95% CI 0.918 to 1.109).

Supplementary table 3: Cumulative results according to definitions of infertility core-out come set

|                            | <b>Blastocyst-stage group</b> | <b>Cleavage-stage group</b> | <b>Absolute Difference* (95% CI)</b> | <b>Risk Ratio* (95% CI)</b> |
|----------------------------|-------------------------------|-----------------------------|--------------------------------------|-----------------------------|
| <b>Cumulative results*</b> |                               |                             |                                      |                             |
| Cumulative live birth rate | 355/603 (58.9%)               | 350/599 (58.4%)             | 0.4 (-5.1 to 5.9)                    | 1.01 (0.84 to 1.22)         |
| Cumulative pregnancy loss  | 97/603 (16.1%)                | 130/599 (21.7%)             | -7.9(-12.4 to -3.4)                  | 0.67 (0.51 to 0.89)         |

Results according to the Standardizing definitions and reporting guidelines for the infertility core outcome set (Duffy et al 2020)<sup>10</sup>

Live birth rate was defined as a delivery resulting in a live born after 20<sup>th</sup> week of gestation.

Pregnancy loss was defined as pregnancy loss prior to 20 weeks of gestational age at delivery.

\*Absolute differences and risk ratios were adjusted for age group.
